# Supplementary material
Source: Springer Nature journal article supplement (https://www.springermedizin.de/resource/supplementary/13063_2011_978_MOESM7_ESM.pdf/9619556)
Supplement: MOESM7 [file 9619556]

# Evaluation Processes for MedReDi

## Patient Focus

- Knowledge - Medication purpose recall
- Illness perception - Brief IPQ
- Risk perception - PHRQ
- Beliefs about medicines - BMQ
- Adherence behaviours - TABS

Self efficacy - Cardiac Self-Efficacy Scale

Medication adherence and persistence - MPR  
and Morisky analysed separately

Patient selection  
processes

Patients  
selected

## Intervention Processes

Patient Focus

Professional  
Focus

## Health System Factors

Organisational  
Design

Inter-  
professional  
Relationships  
and  
Coordination

Outcomes
